# Supplementary material for: Adipose Tissue Properties in Tumor-Bearing Breasts
Source: PubMed Central journal article supplement (PMC7472783; doi:10.3389/fonc.2020.01506), 2020-08-21
Supplement: Data_Sheet_1.pdf [file Data_Sheet_1.pdf]

**Supplemental Table S1:** Comparison of secretion values by AdipTa and AdipTd (ELISA measurements were log<sub>2</sub>-transformed and paired t-tested) showing the high similarity between the two samples in each individual.

|             | Pearson r statistic | Pearson r p-value | Paired t-test p-value |
|-------------|---------------------|-------------------|-----------------------|
| Leptin      | 0.80                | $1.10^{-10}$      | 0.5                   |
| Adiponectin | 0.71                | $2.10^{-7}$       | 0.3                   |
| VEGF        | 0.41                | $7.10^{-3}$       | 0.8                   |
| HGF         | 0.53                | $2.10^{-4}$       | 0.8                   |
| MCP1        | 0.60                | $2.10^{-5}$       | 0.8                   |
| IL-8        | 0.50                | $7.10^{-4}$       | 0.2                   |
| IL6         | 0.51                | $5.10^{-4}$       | 0.4                   |

**Supplemental Table S2:** P-values of associations between IHC scores and secretome. The association test was performed using linear models as described in the methods section. For example, the MCT score well predicts IL8 secretion (on the log<sub>2</sub> scale) ( $p = 0.006$ ). This is the strongest association we found. It is further illustrated on Figure 5B.

| Secretion levels of | MCP1 | IL-8  | IL6  |
|---------------------|------|-------|------|
| IHC expression of   |      |       |      |
| CD34                | 0.64 | 0.27  | 0.84 |
| CD68                | 0.81 | 0.33  | 0.71 |
| CD163               | 0.38 | 0.09  | 0.21 |
| MCT                 | 0.02 | 0.006 | 0.03 |
