# Supplementary material for: Adipose Tissue Properties in Tumor-Bearing Breasts
Source: Front Oncol. 2020 Aug 21;10:1506. doi: 10.3389/fonc.2020.01506 (PMC7472783; doi:10.3389/fonc.2020.01506)
Supplement: Supplementary file 2 [file Table_1.XLSX]

## Sheet: Table 1
ILMN__ID	Symbol	p-value	FDR	Int (AdipN)	Int (AdipT)	Fold Change (T/N)	Description	Band
ILMN_1780349	TPR	0.0001178	0.191	160.38	889.55	5.54651	translocated promoter region, nuclear basket protein	1q31.1
ILMN_1766264	PI16	0.000345	0.223	128.95	525.23	4.07313	peptidase inhibitor 16	6p21.2
ILMN_1723847	CILP	0.0003021	0.218	362.99	1240.6	3.41773	cartilage intermediate layer protein	15q22.31
ILMN_1733415	MFAP5	0.0001491	0.194	783.13	2304.28	2.9424	microfibril associated protein 5	12p13.31
ILMN_1687301	VCAN	0.0009136	0.257	260.76	686.44	2.63246	versican	5q14.2
ILMN_1772964	CCL8	8.72e-05	0.161	250.46	636.05	2.53953	C-C motif chemokine ligand 8	17q12
ILMN_1672536	FBLN1	8.43e-05	0.161	1407.72	3441.48	2.44472	fibulin 1	22q13.31
ILMN_1700541	FBLN1	0.0004813	0.237	282.23	669.97	2.37384	fibulin 1	22q13.31
ILMN_1722622	CD163	0.0003812	0.223	194.87	447.09	2.2943	CD163 molecule	12p13.31
ILMN_1766914	MFAP4	1.54e-05	0.102	936.24	2131.1	2.27623	microfibril associated protein 4	17p11.2
ILMN_2379599	CD163	0.000612	0.243	258.52	585.49	2.26478	CD163 molecule	12p13.31
ILMN_1740015	CD14	4.93e-05	0.148	380.15	834.27	2.19458	CD14 molecule	5q31.3
ILMN_2396444	CD14	7.9e-06	0.076	1598.18	3448.56	2.1578	CD14 molecule	5q31.3
ILMN_1770800	PODN	0.0001351	0.191	403.36	844.27	2.09309	podocan	1p32.3
ILMN_1686623	CSF1R	0.0001933	0.211	573.12	1184.07	2.06601	colony stimulating factor 1 receptor	5q32
ILMN_1796409	C1QB	0.0004976	0.237	606.54	1214.9	2.003	complement C1q B chain	1p36.12
ILMN_1721035	MS4A6A	0.0002097	0.211	365.05	724.73	1.98529	membrane spanning 4-domains A6A	11q12.2
ILMN_1785902	C1QC	0.0008298	0.257	566.05	1069.78	1.8899	complement C1q C chain	1p36.12
ILMN_2157441	HLA-DRA	0.0003129	0.218	2298.7	4084.7	1.77696	major histocompatibility complex, class II, DR alpha	6p21.32
ILMN_2332964	LGMN	0.0005853	0.243	402.07	714.43	1.77688	legumain	14q32.12
ILMN_1654396	ITGB2	0.0006266	0.243	539.36	956.18	1.7728	integrin subunit beta 2	21q22.3
ILMN_1698019	LGMN	0.0009065	0.257	863.3	1514.43	1.75423	legumain	14q32.12
ILMN_2175912	ITGB2	0.0008668	0.257	572.49	999.1	1.74518	integrin subunit beta 2	21q22.3
ILMN_1657803	CFH	0.0004983	0.237	475.13	827.18	1.74096	complement factor H	1q31.3
ILMN_2206746	BGN	0.0009225	0.257	1456.81	2469.37	1.69505	biglycan	Xq28
ILMN_1781626	C1S	0.0002289	0.212	1351.18	2256.28	1.66986	complement C1s	12p13.31
ILMN_1654398	RGL1	4.72e-05	0.148	823.47	1261.04	1.53137	ral guanine nucleotide dissociation stimulator like 1	1q25.3
ILMN_2223941	FBLN5	0.0001581	0.2	832.63	1270.29	1.52564	fibulin 5	14q32.12
ILMN_1672660	MBP	0.0008256	0.257	279.25	399.81	1.43173	myelin basic protein	18q23
ILMN_1701731	AKR1B1	4.11e-05	0.141	495.1	703.9	1.42173	aldo-keto reductase family 1 member B	7q33
ILMN_1698766	PYCARD	0.0008629	0.257	253.16	359.25	1.41906	PYD and CARD domain containing	16p11.2
ILMN_2115434	RAB32	0.0002861	0.216	297.46	414.77	1.39437	RAB32, member RAS oncogene family	6q24.3
ILMN_1780057	RENBP	0.000892	0.257	198.27	274.08	1.38236	renin binding protein	Xq28
ILMN_1784709	GNPDA1	0.0003418	0.223	408.08	560.64	1.37385	glucosamine-6-phosphate deaminase 1	5q31.3
ILMN_1767816	APH1B	9e-07	0.0144	162.42	221.44	1.36338	aph-1 homolog B, gamma-secretase subunit	15q22.2
ILMN_1733288	C1RL	0.0002958	0.218	217.46	295.94	1.36089	complement C1r subcomponent like	12p13.31
ILMN_1716678	NPC2	1.9e-05	0.102	3353.74	4542.65	1.3545	NPC intracellular cholesterol transporter 2	14q24.3
ILMN_1668605	NAAA	0.0007572	0.257	173.53	228.41	1.31626	N-acylethanolamine acid amidase	4q21.1
ILMN_1703441	ZNF593	0.0008612	0.257	285.78	371.22	1.29897	zinc finger protein 593	1p36.11
ILMN_1865764	-	0.0002626	0.212	486.15	626.88	1.28948	-	-
ILMN_1662026	BTK	0.0009374	0.259	107.79	138.81	1.28778	Bruton tyrosine kinase	Xq22.1
ILMN_2410783	GAA	0.0006748	0.252	125.96	158.48	1.25818	glucosidase alpha, acid	17q25.3
ILMN_1787705	ATP6V1B2	0.0004708	0.237	1001.81	1256.95	1.25468	ATPase H+ transporting V1 subunit B2	8p21.3
ILMN_2347145	DCN	0.0008295	0.257	9403.35	11728.6	1.24728	decorin	12q21.33
ILMN_1755123	GBA	0.0008455	0.257	161.23	198.8	1.23302	glucosylceramidase beta	1q22
ILMN_1806692	HEXB	0.000602	0.243	1703.52	2091.17	1.22756	hexosaminidase subunit beta	5q13.3
ILMN_3248803	-	0.0009258	0.257	107.4	130.37	1.21387	-	-
ILMN_1750401	CYBC1	0.0008756	0.257	189.16	229.57	1.21363	cytochrome b-245 chaperone 1	17q25.3
ILMN_2142554	NENF	0.0003708	0.223	1123.78	1358.92	1.20924	neudesin neurotrophic factor	1q32.3
ILMN_1763144	NEU1	0.0002109	0.211	235	282.68	1.20289	neuraminidase 1	6p21.33
ILMN_2167416	MR1	0.0002102	0.211	105.07	126.32	1.20225	major histocompatibility complex, class I-related	1q25.3
ILMN_1744795	TBL1X	0.0002237	0.212	271.11	325.59	1.20095	transducin beta like 1 X-linked	Xp22.31
ILMN_1765801	GAA	0.0005754	0.243	143.22	171.84	1.19983	glucosidase alpha, acid	17q25.3
ILMN_2393169	THOC5	0.0007377	0.257	184.63	219.03	1.18632	THO complex 5	22q12.2
ILMN_1803779	AP2A2	0.0009179	0.257	137.56	162.06	1.1781	adaptor related protein complex 2 subunit alpha 2	11p15.5
ILMN_2268990	DRD3	0.0001125	0.191	86.43	100.45	1.16221	dopamine receptor D3	3q13.31
ILMN_1782551	E2F5	8.64e-05	0.161	97.36	110.69	1.13691	E2F transcription factor 5	8q21.2
ILMN_1658805	BABAM2	0.0003097	0.218	83.4	94.76	1.13621	BRISC and BRCA1 A complex member 2	2p23.2
ILMN_1669447	PYHIN1	0.0007648	0.257	81.5	91.84	1.12687	pyrin and HIN domain family member 1	1q23.1
ILMN_3276150	PPBPP1	0.000755	0.257	80.38	89.02	1.10749	pro-platelet basic protein pseudogene 1	4q13.3
ILMN_1811858	-	0.0008722	0.257	78.67	85.52	1.08707	-	-
ILMN_1722825	LINC00304	0.0007368	0.257	92.45	84.64	-1.09227	long intergenic non-protein coding RNA 304	16q24.3
ILMN_1711615	-	0.0009674	0.264	93.03	85.11	-1.09306	-	-
ILMN_1842568	-	0.0008098	0.257	93.07	84.85	-1.09688	-	-
ILMN_3243410	-	0.0008318	0.257	89.64	81.7	-1.09718	-	-
ILMN_3287986	NSA2P2	0.0006597	0.25	96.78	88.16	-1.09778	NSA2 pseudogene 2	12q22
ILMN_1744445	USP17L1	0.0007232	0.257	94.98	85.65	-1.10893	ubiquitin specific peptidase 17 like family member 1	8p23.1
ILMN_1687390	IFRD1	0.000616	0.243	92.42	83.07	-1.11256	interferon related developmental regulator 1	7q31.1
ILMN_1802872	PPIL2	0.0009042	0.257	93.3	83.79	-1.1135	peptidylprolyl isomerase like 2	22q11.21
ILMN_1707304	KLF1	0.0008651	0.257	99.6	89.22	-1.11634	Kruppel like factor 1	19p13.13
ILMN_1705587	-	6.51e-05	0.157	97.62	87.17	-1.11988	-	-
ILMN_1718848	QRFP	0.0002154	0.211	88.41	78.93	-1.12011	pyroglutamylated RFamide peptide	9q34.12
ILMN_3165699	-	0.0005293	0.241	86.29	76.96	-1.12123	-	-
ILMN_1805255	RAB34	0.0004143	0.229	90.5	80.67	-1.12185	RAB34, member RAS oncogene family	17q11.2
ILMN_1810254	MEI1	0.0004245	0.229	90.17	80.27	-1.12333	meiotic double-stranded break formation protein 1	22q13.2
ILMN_1813297	CD99P1	0.0006026	0.243	94.15	83.76	-1.12404	CD99 molecule pseudogene 1	Xp22.33
ILMN_1771600	THAP7	0.0004836	0.237	91.17	80.84	-1.12778	THAP domain containing 7	22q11.21
ILMN_1672049	LINC00944	0.0004176	0.229	93.12	82.55	-1.12804	long intergenic non-protein coding RNA 944	12q24.32
ILMN_1864587	-	0.0002496	0.212	95.22	84.3	-1.12954	-	-
ILMN_1789828	VPS13A	0.0004624	0.237	94.65	83.7	-1.13082	vacuolar protein sorting 13 homolog A	9q21.2
ILMN_1894172	-	0.0007967	0.257	102.93	91.01	-1.13097	-	-
ILMN_1799872	-	0.0002299	0.212	96.26	85.04	-1.13194	-	-
ILMN_1656069	LINC00482	0.0007386	0.257	99.32	87.55	-1.13444	long intergenic non-protein coding RNA 482	17q25.3
ILMN_1861972	-	0.0003785	0.223	101.97	89.8	-1.13552	-	-
ILMN_1692863	-	0.0003207	0.218	97.12	85.47	-1.13631	-	-
ILMN_1654641	C1DP3	0.0006186	0.243	97.37	85.65	-1.13684	C1D nuclear receptor corepressor pseudogene 3	10q22.3
ILMN_2345119	NLGN4X	0.0009558	0.263	116.1	101.76	-1.14092	neuroligin 4 X-linked	Xp22.32
ILMN_1856229	-	0.0008382	0.257	98.86	86.31	-1.14541	-	-
ILMN_1695097	SLC9A3P3	0.0005262	0.241	95.06	82.86	-1.14724	solute carrier family 9 member 3 pseudogene 3	10q11.23
ILMN_1671272	PKD1L1	0.0007012	0.257	105.32	91.58	-1.15003	polycystin 1 like 1, transient receptor potential channel interacting	7p12.3
ILMN_3199454	MAPRE1P2	0.0004418	0.234	97.63	84.76	-1.15184	MAPRE1 pseudogene 2	4p15.1
ILMN_3310673	MIR1208	0.0003855	0.223	101.28	87.81	-1.1534	microRNA 1208	8q24.21
ILMN_3241853	RRP7BP	2.56e-05	0.112	16215.1	13998.1	-1.15838	ribosomal RNA processing 7 homolog B, pseudogene	22q13.2
ILMN_2260392	ACTR3B	0.0001716	0.211	108.89	93.8	-1.16087	actin related protein 3B	7q36.1
ILMN_1727833	KIF19	7.2e-05	0.157	104.88	90.21	-1.16262	kinesin family member 19	17q25.1
ILMN_1790650	CEP20	0.0006738	0.252	668.22	573.49	-1.16518	centrosomal protein 20	16p13.11
ILMN_2250521	INS-IGF2	0.000447	0.234	111.95	95.36	-1.17397	INS-IGF2 readthrough	11p15.5
ILMN_2322831	NOS2	0.0005965	0.243	106.5	90.36	-1.17862	nitric oxide synthase 2	17q11.2
ILMN_1813503	SEMA6C	0.0002141	0.211	130.31	110.55	-1.17874	semaphorin 6C	1q21.3
ILMN_1901769	-	0.0009254	0.257	123.83	104.96	-1.17978	-	-
ILMN_3236627	-	0.0006453	0.246	105.37	89.16	-1.18181	-	-
ILMN_1651238	TRPV1	0.0003555	0.223	96.76	81.82	-1.1826	transient receptor potential cation channel subfamily V member 1	17p13.2
ILMN_1661454	DGKA	0.000572	0.243	103.02	86.8	-1.18687	diacylglycerol kinase alpha	12q13.2
ILMN_1819854	-	0.0007351	0.257	134.31	112.81	-1.19059	-	-
ILMN_3230215	TOX2	0.000621	0.243	120.27	100.81	-1.19304	TOX high mobility group box family member 2	20q13.12
ILMN_1705172	SLC26A7	0.000453	0.234	116.69	97.67	-1.19474	solute carrier family 26 member 7	8q21.3
ILMN_1651652	RTN3	7.02e-05	0.157	119.25	99.8	-1.19489	reticulon 3	11q13.1
ILMN_1688515	ZNF195	0.0005854	0.243	208.16	174.18	-1.19509	zinc finger protein 195	11p15.4
ILMN_1745108	ADAD2	0.0002642	0.212	101.25	84.36	-1.20021	adenosine deaminase domain containing 2	16q24.1
ILMN_2223010	VBP1	5.66e-05	0.155	988.67	822.22	-1.20244	VHL binding protein 1	Xq28
ILMN_1803650	MYCL	0.0003641	0.223	128.94	107.21	-1.20269	MYCL proto-oncogene, bHLH transcription factor	1p34.2
ILMN_1671372	RPL10AP3	0.0006012	0.243	148.48	123.43	-1.20295	ribosomal protein L10a pseudogene 3	8p12
ILMN_1662824	MADCAM1	5.81e-05	0.155	101.35	84.22	-1.2034	mucosal vascular addressin cell adhesion molecule 1	19p13.3
ILMN_1712894	FUT1	0.0008456	0.257	117.26	97.35	-1.20452	fucosyltransferase 1 (H blood group)	19q13.33
ILMN_2106818	MBIP	0.0001986	0.211	317.38	262.31	-1.20994	MAP3K12 binding inhibitory protein 1	14q13.3
ILMN_1666420	ZNF679	0.0001489	0.194	134.2	110.4	-1.21558	zinc finger protein 679	7q11.21
ILMN_2144352	SPDYE7P	0.0002575	0.212	124.05	102.04	-1.2157	speedy/RINGO cell cycle regulator family member E7, pseudogene	7q11.23
ILMN_1714600	NAV3	0.00037	0.223	146.72	119.26	-1.23025	neuron navigator 3	12q21.2
ILMN_3247261	RAPGEF2	0.0009982	0.271	706.67	573.23	-1.23279	Rap guanine nucleotide exchange factor 2	4q32.1
ILMN_1678810	KIF27	0.0003221	0.218	137.66	111.32	-1.23662	kinesin family member 27	9q21.32
ILMN_2131493	MAVS	0.000126	0.191	194.43	156.65	-1.24117	mitochondrial antiviral signaling protein	20p13
ILMN_2128668	FOXJ3	0.0005327	0.241	1070.2	857.56	-1.24796	forkhead box J3	1p34.2
ILMN_3237617	RNU5A-1	0.0008515	0.257	122.14	97.84	-1.24836	RNA, U5A small nuclear 1	15q22.31
ILMN_1696434	LAMA1	0.0006024	0.243	119.24	95.47	-1.24898	laminin subunit alpha 1	18p11.31
ILMN_1685258	TMEM14B	0.0008008	0.257	2047.92	1636.43	-1.25146	transmembrane protein 14B	6p24.2
ILMN_1703273	UACA	0.0007644	0.257	195.71	156.38	-1.2515	uveal autoantigen with coiled-coil domains and ankyrin repeats	15q23
ILMN_1753016	MRPL35	0.000133	0.191	247.52	197.34	-1.25428	mitochondrial ribosomal protein L35	2p11.2
ILMN_1657682	GFM1	3.77e-05	0.14	915.54	728.47	-1.2568	G elongation factor mitochondrial 1	3q25.32
ILMN_1749474	ULK4P1	0.0001894	0.211	127.3	101.13	-1.25878	ULK4 pseudogene 1	15q13.2
ILMN_1686846	AKAP12	0.0001421	0.194	182.23	144.24	-1.26338	A-kinase anchoring protein 12	6q25.1
ILMN_1795474	CCT8P1	0.0004308	0.23	411.13	321.88	-1.27728	chaperonin containing TCP1 subunit 8 pseudogene 1	1q21.1
ILMN_3240997	ARAP3	0.000613	0.243	484.84	374.39	-1.29501	ArfGAP with RhoGAP domain, ankyrin repeat and PH domain 3	5q31.3
ILMN_1674967	TSGA10	0.0008998	0.257	137.77	106.1	-1.29849	testis specific 10	2q11.2
ILMN_3280847	-	0.0002419	0.212	483.85	370.31	-1.30661	-	-
ILMN_1664348	PNPLA4	0.0003743	0.223	224.59	171.05	-1.31301	patatin like phospholipase domain containing 4	Xp22.31
ILMN_1721138	GRPEL2	6.78e-05	0.157	482.7	367.32	-1.31411	GrpE like 2, mitochondrial	5q32
ILMN_1739083	SIRT1	0.0002488	0.212	521.14	396.51	-1.31432	sirtuin 1	10q21.3
ILMN_2405602	OSBPL1A	0.0002871	0.216	2864.31	2171.27	-1.31919	oxysterol binding protein like 1A	18q11.2
ILMN_1698487	SDHD	0.0005278	0.241	1371.04	1038.52	-1.32019	succinate dehydrogenase complex subunit D	11q23.1
ILMN_1664292	ZNF415	0.0005571	0.243	254.56	191.81	-1.32715	zinc finger protein 415	19q13.42
ILMN_1751901	TMEM163	2.36e-05	0.112	143.88	107.52	-1.33817	transmembrane protein 163	2q21.3
ILMN_1804415	SMAGP	2.93e-05	0.117	253.5	189.32	-1.339	small cell adhesion glycoprotein	12q13.13
ILMN_2139351	ZNF232	0.0002014	0.211	211.71	157.4	-1.34504	zinc finger protein 232	17p13.2
ILMN_2097858	CIPC	0.0003981	0.228	735.47	545.94	-1.34716	CLOCK interacting pacemaker	14q24.3
ILMN_1657760	SYT17	0.0008782	0.257	147.51	109.36	-1.34885	synaptotagmin 17	16p12.3
ILMN_2093027	MYO1B	9.26e-05	0.165	1194.82	885.13	-1.34988	myosin IB	2q32.3
ILMN_2110422	PKD1L1	8.34e-05	0.161	151.12	111.14	-1.35973	polycystin 1 like 1, transient receptor potential channel interacting	7p12.3
ILMN_1738207	CISH	0.0003658	0.223	142.45	104.02	-1.36945	cytokine inducible SH2 containing protein	3p21.2
ILMN_1713764	-	0.0008245	0.257	225.92	162.63	-1.38917	-	-
ILMN_1787251	DAAM1	0.0003443	0.223	1239.34	883.98	-1.402	dishevelled associated activator of morphogenesis 1	14q23.1
ILMN_2194229	TMEM128	0.0002049	0.211	238.07	169.48	-1.40471	transmembrane protein 128	4p16.3
ILMN_1669982	CCDC85A	0.0005071	0.239	748.82	530.83	-1.41066	coiled-coil domain containing 85A	2p16.1
ILMN_1673129	PCDH12	0.000537	0.241	315.52	219.65	-1.43647	protocadherin 12	5q31.3
ILMN_2134056	SOX7	0.0007733	0.257	223.89	155.86	-1.43648	SRY-box transcription factor 7	8p23.1
ILMN_1698706	NID2	0.0007888	0.257	306.62	211.84	-1.44741	nidogen 2	14q22.1
ILMN_1654268	HMGB2	0.0007831	0.257	449.4	309.47	-1.45216	high mobility group box 2	4q34.1
ILMN_1765945	POTEC	0.0004186	0.229	197.5	135.92	-1.45306	POTE ankyrin domain family member C	18p11.21
ILMN_1703511	PDZRN3	0.0002719	0.214	547.52	374.99	-1.46009	PDZ domain containing ring finger 3	3p13
ILMN_1911721	-	0.0008346	0.257	616.75	420.81	-1.46563	-	-
ILMN_1702231	C1orf54	0.000636	0.245	835.63	554.6	-1.50673	chromosome 1 open reading frame 54	1q21.2
ILMN_1757440	DIPK1B	0.0008346	0.257	546.08	357.61	-1.52703	divergent protein kinase domain 1B	9q34.3
ILMN_3245983	NEURL1B	3.5e-06	0.0421	1362.11	889.87	-1.53068	neuralized E3 ubiquitin protein ligase 1B	5q35.1
ILMN_1717935	SPTA1	0.0002786	0.216	147.37	95.46	-1.54379	spectrin alpha, erythrocytic 1	1q23.1
ILMN_3307483	MCF2L	0.0004828	0.237	400.24	255.45	-1.5668	MCF.2 cell line derived transforming sequence like	13q34
ILMN_1700733	FAM214A	0.0004193	0.229	966.73	603.92	-1.60076	family with sequence similarity 214 member A	15q21.2
ILMN_2102960	FAM214A	1.29e-05	0.102	934.02	582.3	-1.60402	family with sequence similarity 214 member A	15q21.2
ILMN_1757129	TMEM88	1.76e-05	0.102	488.68	301.42	-1.62126	transmembrane protein 88	17p13.1
ILMN_2350607	NDUFAF5	0.0002618	0.212	402.32	247.87	-1.62311	NADH:ubiquinone oxidoreductase complex assembly factor 5	20p12.1
ILMN_1813344	NDUFAF5	0.0001231	0.191	701.07	429.35	-1.63286	NADH:ubiquinone oxidoreductase complex assembly factor 5	20p12.1
ILMN_1759232	IRS1	0.0004886	0.237	520.18	311.37	-1.67062	insulin receptor substrate 1	2q36.3
ILMN_1680132	CADM1	0.0008476	0.257	459.63	274.26	-1.67589	cell adhesion molecule 1	11q23.3
ILMN_1691616	-	0.0005705	0.243	286.1	170.47	-1.6783	-	-
ILMN_1651285	BCL6B	0.0002469	0.212	638.85	376.69	-1.69596	BCL6B transcription repressor	17p13.1
ILMN_2359287	ITGA6	6e-07	0.0144	514.07	302.84	-1.6975	integrin subunit alpha 6	2q31.1
ILMN_1815679	COL6A6	0.0003057	0.218	214.45	124.37	-1.72429	collagen type VI alpha 6 chain	3q22.1
ILMN_3237932	COL6A6	0.0001322	0.191	224.91	126.45	-1.77865	collagen type VI alpha 6 chain	3q22.1
ILMN_1690304	ANKRD20A5P	1e-07	0.00481	209.82	107.9	-1.94458	ankyrin repeat domain 20 family member A5, pseudogene	18p11.21
